# Supplementary figures and images for: Clinical evaluation of viral acute respiratory tract infections in children presenting to the emergency department of a tertiary referral hospital in the Netherlands
Source: Springer Nature journal article supplement (doi:10.1186/s12887-014-0297-0), 2014-12-01

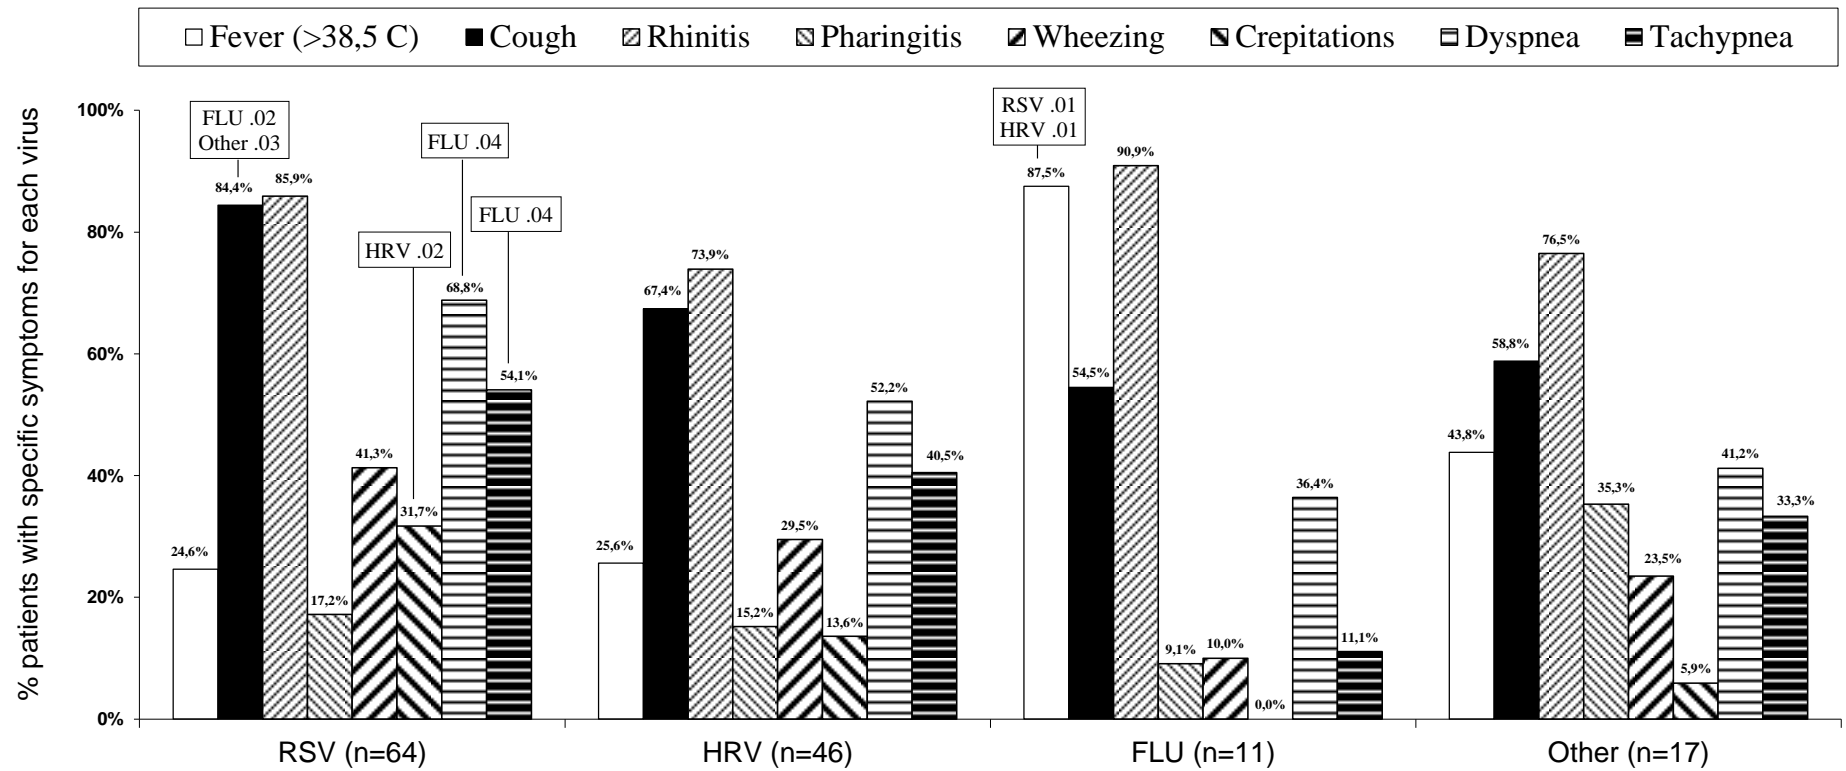

**Figure 2. ARTI symptoms associated with individual respiratory viruses in children aged < 3 years**

Supplement: MOESM4 [file 9746778]
